# Supplementary material
Source: publisher site journal article supplement (https://www.dovepress.com/article/545880)
Supplement: Supplementary file 1 [file supporting%20information%20revised.doc]

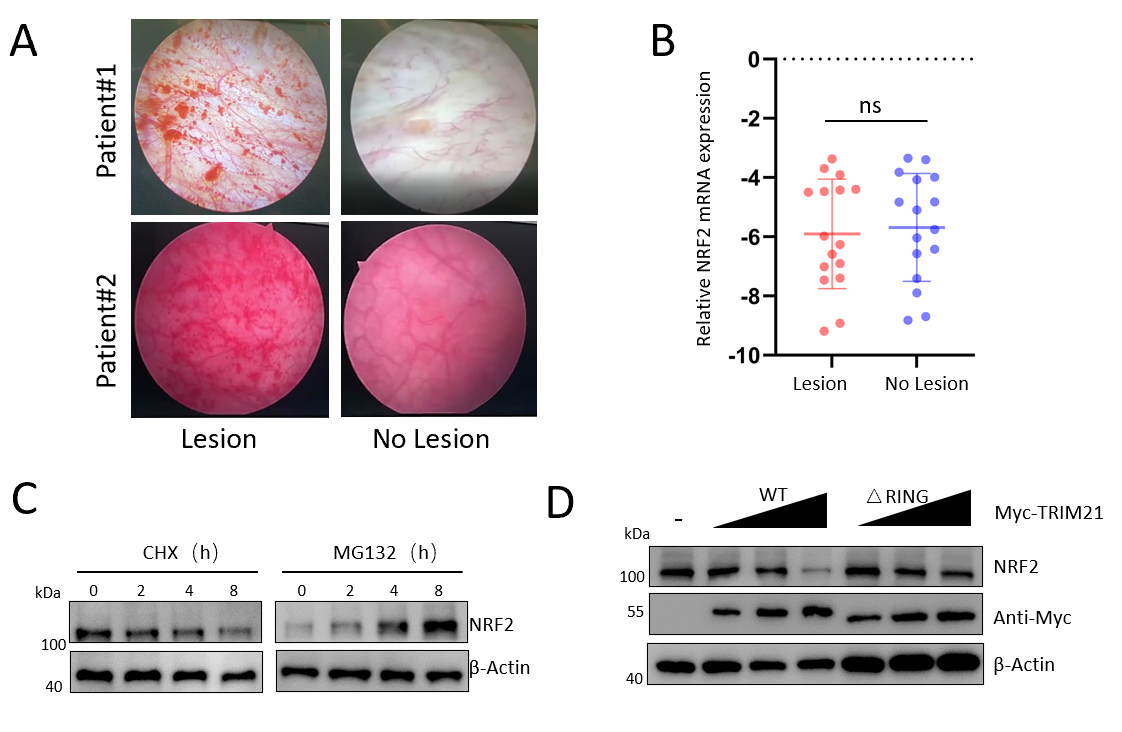


**Fig. S1 IC/BPS cystoscopic findings, PCR results, and TRIM21-mediated ubiquitin-proteasomal degradation of NRF2.** **A** Representative cystoscopic images of lesional and non-lesional bladder mucosa of IC/BPS patients. **B** RT‒qPCR analysis of NRF2 expression in lesional and non-lesional bladder mucosa of IC/BPS patients. **C** Western blotting was performed to determine the level of NRF2 in SV-HUC-1 cells treated with CHX or MG132 at the indicated time. **D** Increasing amounts of Myc-labeled wild-type TRIM21 or TRIM21 ΔRING were transfected into HEK293T cells, and cell lysates were analyzed by western blot. *ns*=not significant.


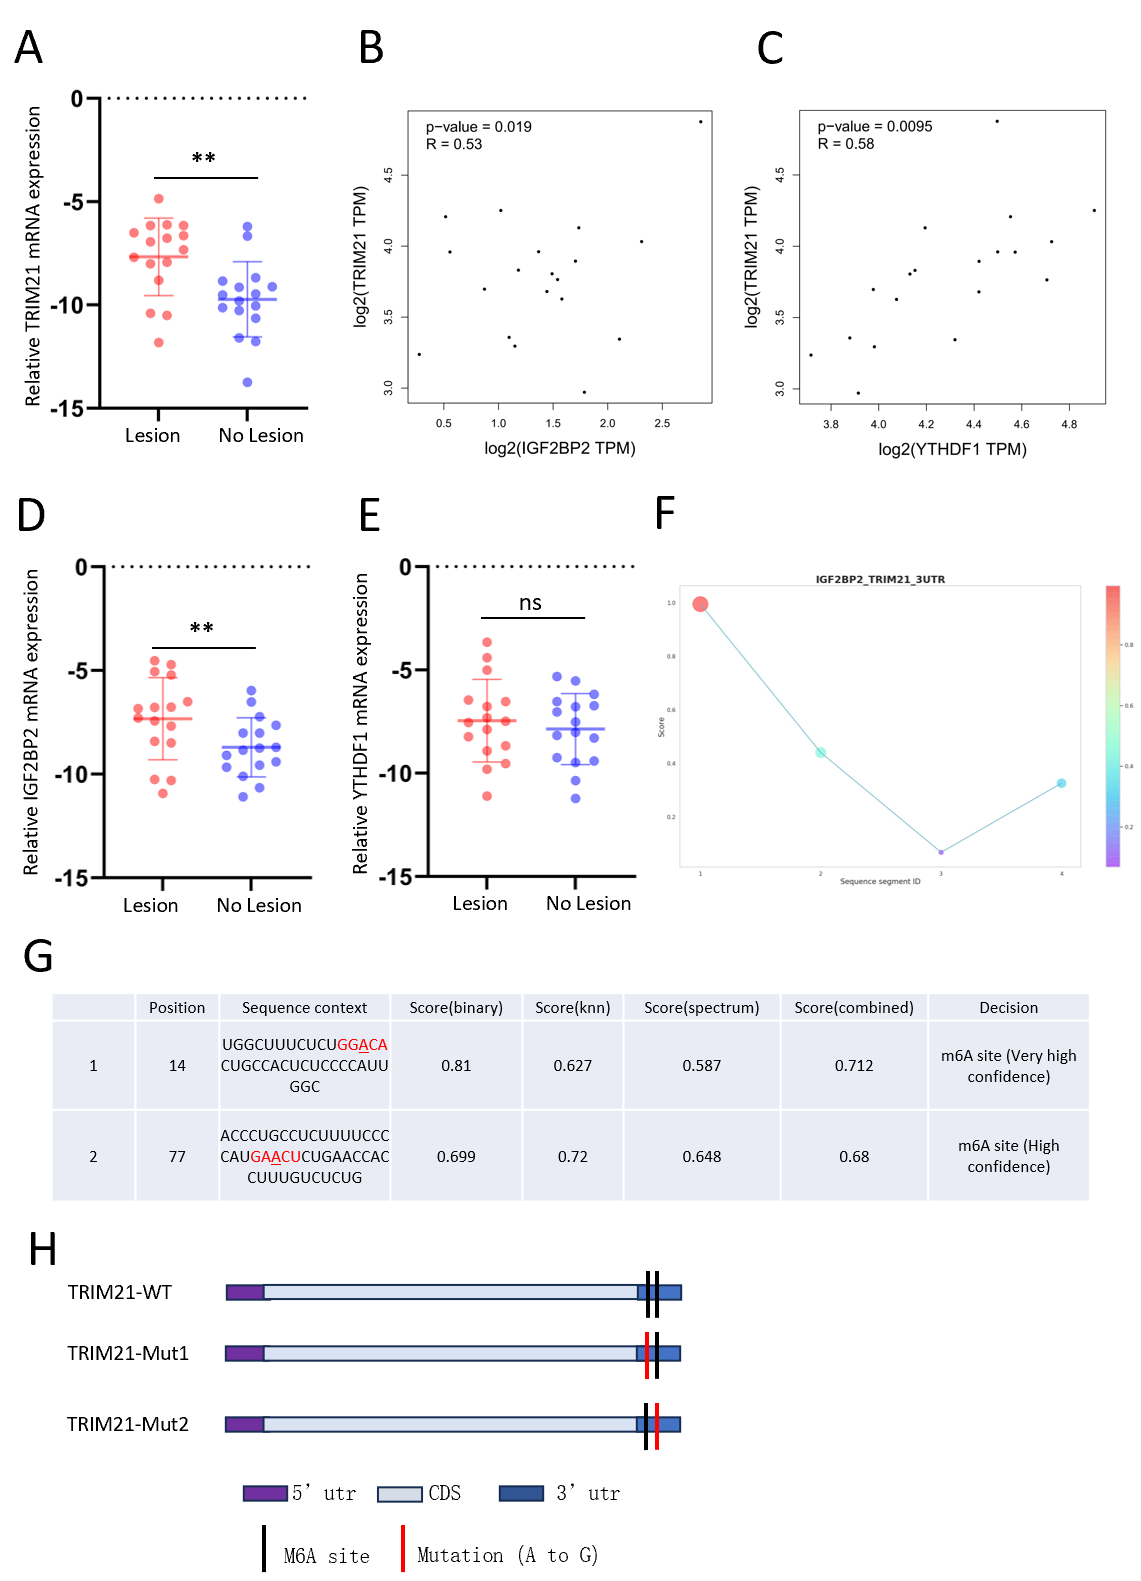


**Fig. S2** **TRIM21 is upregulated by m6A modification. A** RT‒qPCR analysis of TRIM21 expression in lesional and non-lesional bladder mucosa of IC/BPS patients. **B, C** GEPIA database showed positive correlation between mRNA expression of IGF2BP2 and TRIM21 or YTHDF1 and TRIM21. **D, E** RT‒qPCR analysis of IGF2BP2 and YTHDF1 expression in lesional and non-lesional bladder mucosa of IC/BPS patients. **F, G** RGB suite and SRAMP website predicted the possible binding sites for IGF2BP2 and TRIM21 mRNA. **H** Illustration of various mutated TRIM21 plasmids. ** *P* < 0.01, *ns*=not significant.


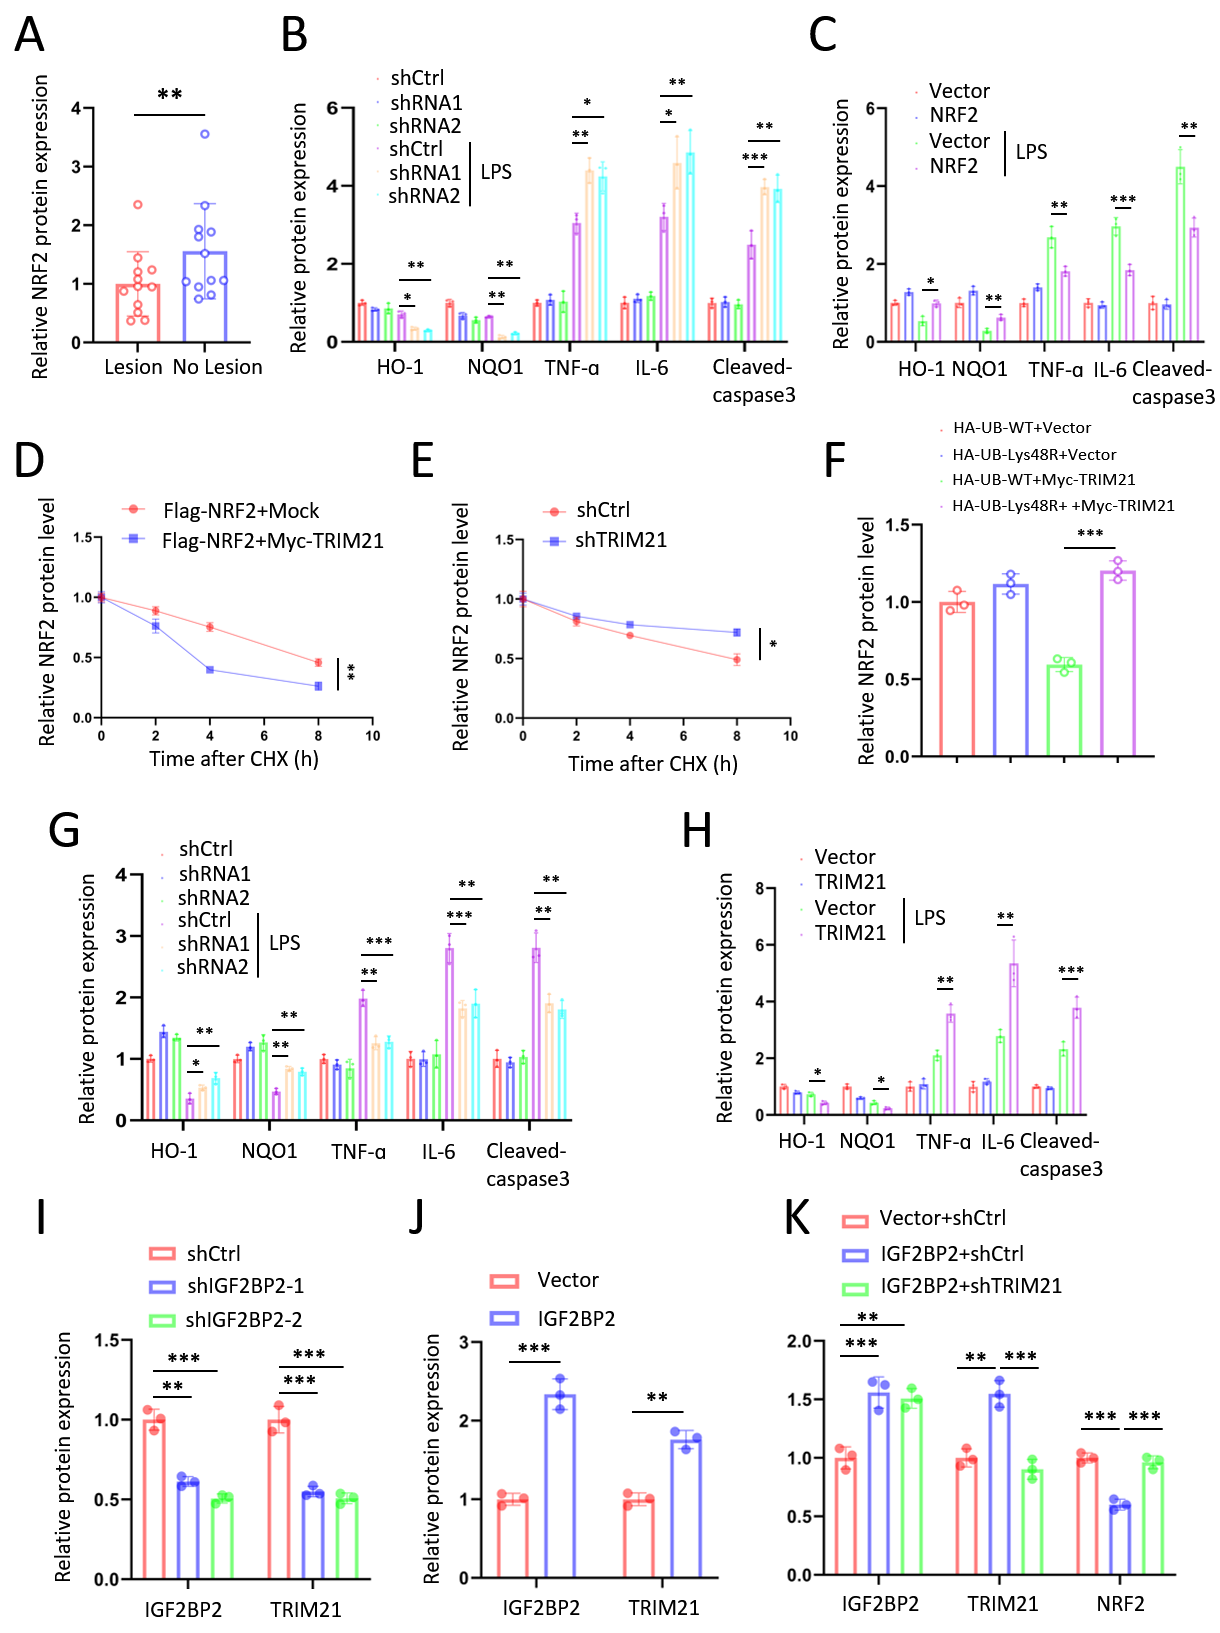


**Fig. S3** **Quantitative data for western blots. A** Quantification of NRF2 levels relative to β-actin of figure1B. **B, C** Quantification of HO-1, NQO1, TNF-ɑ, IL-6, and Cleaved-caspase3 levels relative to β-actin of figure2D and 2E. **D, E** Quantification of NRF2 levels relative to β-actin treated after CHX of figure4A and 4B. **F** Quantification of NRF2 levels relative to β-actin of figure4G. **G, H** Quantification of HO-1, NQO1, TNF-ɑ, IL-6, and Cleaved-caspase3 levels relative to β-actin of figure5D and 5E. **I, J** Quantification of IGF2BP2 and TRIM21 levels relative to β-actin of figure6C and 6E. **K** Quantification of IGF2BP2, TRIM21 and NRF2 levels relative to β-actin of figure6G. * *P* < 0.05, ** *P* < 0.01, *** *P* < 0.001.

**Box S1 Inclusion and exclusion criteria of the patients with IC/BPS.**

| **Inclusion criteria** |
| --- |
| 1. patients aged 18 to 70; 2. Previously diagnosed with interstitial cystitis for a duration of >6 months; 3. The characteristic pathological findings in the bladder wall were identified by cystoscopy; 4. O’Leary-Sant Interstitial Cystitis Symptom and Problem Index score (ICSI + ICPI) over 18; 5. Patients understand the purpose of this study as explained by the investigator and that they can withdraw from the study at any time.   **Exclusion criteria**   1. having comorbid conditions, such as serious heart, lung, liver, kidney or blood diseases, liver function abnormalities, kidney insufficiency; 2. female patients who were pregnant or lactating; 3. having urinary tract infection within 3 months; 4. a history of bladder hydrodistension, transurethral resection of bladder, and sacral neuromodulation within 3 months; 5. treatment with oral medications or intravesical instillation within 3 months. |

ICSI: O’Leary-Sant Interstitial Cystitis Symptom Index

ICPI: O’Leary-Sant Interstitial Cystitis Problem Index

**Table S1 The baseline information of the included patients**

|  | Gender | Age (years) | Duration (months) | BMI | ICSI | ICPI |
| --- | --- | --- | --- | --- | --- | --- |
| 1 | Female | 36 | 18 | 24.03 | 16 | 13 |
| 2 | Female | 59 | 43 | 28.20 | 17 | 14 |
| 3 | Female | 55 | 36 | 19.23 | 18 | 16 |
| 4 | Female | 50 | 29 | 20.32 | 13 | 13 |
| 5 | Female | 59 | 74 | 25.32 | 12 | 13 |
| 6 | Female | 57 | 61 | 23.11 | 17 | 10 |
| 7 | Female | 59 | 58 | 26.90 | 14 | 12 |
| 8 | Female | 43 | 39 | 19.78 | 14 | 16 |
| 9 | Female | 34 | 23 | 22.67 | 17 | 15 |
| 10 | Female | 56 | 71 | 18.29 | 13 | 11 |
| 11 | Female | 58 | 46 | 28.20 | 19 | 16 |
| 12 | Female | 48 | 85 | 23.80 | 15 | 15 |
| 13 | Female | 59 | 47 | 24.09 | 10 | 15 |
| 14 | Female | 65 | 113 | 27.27 | 16 | 12 |
| 15 | Female | 63 | 62 | 25.07 | 17 | 13 |
| 16 | Female | 66 | 57 | 21.67 | 15 | 12 |

ICSI: O’Leary-Sant Interstitial Cystitis Symptom Index

ICPI: O’Leary-Sant Interstitial Cystitis Problem Index

**Table S2** ShRNA sequences used in our study

| Gene | shRNAs |
| --- | --- |
| shNRF2-1  shNRF2-2 | 5′-GCTCCTACTGTGATGTGAAAT-3′  5′-CCGGCATTTCACTAAACACAA -3′ |
| shTRIM21-1  shTRIM21-2 | 5'-CTGCCTTCTTTATGGGACTTA-3′  5′-UCAUUGUCAAGCGUGCUGC-3′′ |
| shIGF2BP2-1  shIGF2BP2-2 | 5′-AGTGAAGCTGGAAGCGCATAT-3′  5′- CAUGCCGCAUGAUUCUUGATT-3′ |

**Table S3 Primers used for qPCR**

| Gene | Primers |
| --- | --- |
| NRF2 | Forward: 5′- AGGACATGGAGCAAGTTTGG -3′  Reverse: 5′- TCTGTCAGTGTGGCTTCTGG -3′ |
| TRIM21 | Forward: 5′-TGCTGCAGGAGGTGATAAT-3′  Reverse: 5′-TCCTGAGTTCTGGAGAGGTAATA-3′ |
| IGF2BP2 | Forward: 5′-GCCCCTCATTAAGCCCAAG-3′  Reverse: 5′-TTGTGGTGGTCTGACAGTTCG-3′ |
| TYHDF1 | Forward: 5′-ATACCTCACCACCTACGGACA-3′  Reverse: 5′-GTGCTGATAGATGTTGTTCCCC-3′ |
| β-Actin | Forward: 5′-AAGTGTGACGTTGACATCCG-3′  Reverse: 5′-GATCCACATCTGCTGGAAGG-3′ |

**Table S4** Antibodies used in our study

| Antibody | Supplier | Product code |
| --- | --- | --- |
| anti-TRIM21 | Proteintech, Wuhan, China | 67136-1-Ig |
| anti-NRF2 | Proteintech, Wuhan, China | 16396-1-AP |
| anti-NRF2 | Abcam, Cambridge, UK | ab62352 |
| anti-IGF2BP2 | Proteintech, Wuhan, China | 11601-1-AP |
| anti-HO-1 | Affinity, Changzhou,China | AF5393 |
| anti-NQO1 | Affinity, Changzhou,China | DF6437 |
| anti-IL6  anti-TNF-ɑ  anti-Cleaved-caspase3  anti-Flag  anti-HA  anti-Myc  β-Actin  M6A  anti-Rabbit  anti-Mouse  488-conjugated Anti-Rabbit  594-conjugated Anti-Rabbit | Affinity, Changzhou,China  Proteintech, Wuhan, China  Affinity, Changzhou,China  Abcam, Cambridge, UK  Abcam, Cambridge, UK  Abcam, Cambridge, UK  Proteintech, Wuhan, China  Proteintech, Wuhan, China  Proteintech, Wuhan, China  Proteintech, Wuhan, China  Proteintech, Wuhan, China  Proteintech, Wuhan, China | DF6087  60291-1-Ig  AF7022  ab205606  ab18181  ab32  66009-1-Ig  68055-1-lg  SA00001-2  SA00001-1  SA00013-2  SA00013-3 |
